# Supplementary material for: Comparison of biokinetic models for non-dissolvable engineered nanomaterials in freshwater aquatic organisms
Source: Royal Society of Chemistry journal article supplement (doi:10.1039/d2en01039a), 2023-01-01
Supplement: d2en01039a1.pdf [file d2en01039a1.pdf]

## **Comparison of Biokinetic Models for Non-dissolvable Engineered Nanomaterials in Freshwater Aquatic Organisms**

*Yuanfang Zheng<sup>1</sup>, Bernd Nowack<sup>1\*</sup>*

<sup>1</sup>Empa, Swiss Federal Laboratories for Materials Science and Technologies, Technology and Society Lab, Lerchenfeldstrasse 5, 9014 St. Gallen, Switzerland

\*corresponding author: [nowack@empa.ch](mailto:nowack@empa.ch)

### **Supporting Information**

# 1 Calculation of measures for goodness-of-fit

For each nonlinear regression, we calculated the following measures for goodness-of-fit.

Adjusted R squared (adjusted  $R^2$ ) determines the extent of the variance of the dependent variable, which can be explained by the independent variable. It can compensate for possible bias due to different number of parameters:

$$R_{adj}^2 = 1 - \frac{n-1}{n-p} * (1 - R^2) \quad (1)$$

where  $n$  = sample size and  $p$  = number of parameters, and  $R^2$  using the most general definition:<sup>1,2</sup>

$$R^2 = 1 - \frac{RSS}{TSS} = 1 - \frac{\sum(\gamma - \hat{\gamma})^2}{\sum(\gamma - \bar{\gamma})^2} \quad (2)$$

where  $RSS$  = residual sum-of-squares,  $TSS$  = total sum-of-squares,  $\gamma$  = response values,  $\hat{\gamma}$  = fitted values and  $\bar{\gamma}$  = the mean of response values.

The Akaike Information Criterion (AIC) is a measure that is widely accepted for measuring the validity within a cohort of nonlinear models and frequently used for model selection.<sup>3-5</sup> The smaller the value is, the better the model fits:

$$AIC = 2p - 2 \ln(L) \quad (3)$$

where  $p$  = number of parameters and  $\ln(L)$  = maximum log-likelihood of the estimated model.  $\ln(L)$  in the case of a nonlinear fit with normally distributed errors is calculated by

$$\ln(L) = 0.5 * \left( -N * \left( \ln 2\pi + 1 - \ln N + \ln \sum_{i=1}^n x_i^2 \right) \right) \quad (4)$$

where  $x_1, \dots, x_n$  = the residuals from the nonlinear least-squares fit and  $N$  = their number.

It has been suggested that when the sample size is small, especially when the ratio of sample ( $n$ ) and number of parameters ( $p$ ) is less than 40, a bias-corrected AIC (AICc) should be used.<sup>6</sup> The models for comparison do not need to be nested:

$$AICc = AIC + \frac{2p(p+1)}{n-p-1} \quad (5)$$

where  $n$  = sample size and  $p$  = number of parameters. It is important to note that AIC or AICc is only a comparator between models, but not an indication of the quality of the fit itself.<sup>7</sup>

In order to obtain values for the validity of a fit, we used Akaike weights which calculate the weight of evidence for each model within a cohort of models in question.<sup>8,9</sup>

$$w_i(AIC) = \frac{\exp\left\{-\frac{1}{2}\Delta_i(AIC)\right\}}{\sum_{k=1}^K \exp\left\{-\frac{1}{2}\Delta_k(AIC)\right\}} \quad (6)$$

where  $i, k$  = model numbers,  $\Delta_i(AIC)$  = the difference in AIC of each model in comparison the model with the lowest AIC, subsequently normalized to their sum (denominator). Here, we used the bias-corrected AICc for calculating the Akaike weights. To interpret Akaike weight, for example,  $w_i$  of 0.8 for a model implies that it has an 80% chance of being the best among the considered models.

## 2 Model comparison

Table S1: Summary of the non-linear regression results predictions for five models for each dataset.  $C_w$  = water concentration (mg/L), GO = graphene oxide,  $k_u$  = uptake rate;  $k_e$  = elimination rate;  $SF$  = storage fraction,  $C_{sat}$  = body burden at saturated state,  $K_M$  = Michaelis-Menten constant.

| Dataset number | Organisms          | Material         | Exposure type | $C_w$<br>mg/L | Depuration with feeding | Model   | $k_u$<br>L/kg/h | $k_e$<br>1/h | $SF$  | $C_{sat}$<br>mg/kg | $K_M$<br>h | Adjusted R <sup>2</sup> | AICc  | $\Delta(AIC)$ | Akaike weights | Visually cover by 95% confidence bands | Reference     |
|----------------|--------------------|------------------|---------------|---------------|-------------------------|---------|-----------------|--------------|-------|--------------------|------------|-------------------------|-------|---------------|----------------|----------------------------------------|---------------|
| 1              | <i>S. obliquus</i> | C <sub>60</sub>  | aqueous       | 2             | No                      | Model 1 | 1697            | 1.861        | -     | -                  | -          | 0.928                   | 115.0 | 2.6           | 0.13           | No                                     | <sup>10</sup> |
| 1              | <i>S. obliquus</i> | C <sub>60</sub>  | aqueous       | 2             | No                      | Model 2 | 1884            | 2.080        | 0.068 | -                  | -          | 0.926                   | 118.3 | 6.0           | 0.02           | Yes                                    | <sup>10</sup> |
| 1              | <i>S. obliquus</i> | C <sub>60</sub>  | aqueous       | 2             | No                      | Model 3 | 2316            | 2.713        | 0.002 | -                  | -          | 0.953                   | 113.8 | 1.5           | 0.23           | Yes                                    | <sup>10</sup> |
| 1              | <i>S. obliquus</i> | C <sub>60</sub>  | aqueous       | 2             | No                      | Model 4 | 1697            | 1.831        | -     | -                  | -          | 0.928                   | 115.0 | 2.6           | 0.13           | No                                     | <sup>10</sup> |
| 1              | <i>S. obliquus</i> | C <sub>60</sub>  | aqueous       | 2             | No                      | Model 5 | -               | 2.386        | -     | 2026               | 0.555      | 0.944                   | 112.3 | 0.0           | 0.48           | No                                     | <sup>10</sup> |
| 2              | <i>D. magna</i>    | TiO <sub>2</sub> | aqueous       | 1             | Yes                     | Model 1 | 33380           | 0.637        | -     | -                  | -          | 0.977                   | 539.6 | 0.0           | 0.37           | Yes                                    | <sup>11</sup> |
| 2              | <i>D. magna</i>    | TiO <sub>2</sub> | aqueous       | 1             | Yes                     | Model 2 | 33682           | 0.644        | 0.012 | -                  | -          | 0.977                   | 541.6 | 2.0           | 0.13           | Yes                                    | <sup>11</sup> |
| 2              | <i>D. magna</i>    | TiO <sub>2</sub> | aqueous       | 1             | Yes                     | Model 3 | 33874           | 0.653        | 0.001 | -                  | -          | 0.977                   | 541.6 | 2.0           | 0.13           | Yes                                    | <sup>11</sup> |
| 2              | <i>D. magna</i>    | TiO <sub>2</sub> | aqueous       | 1             | Yes                     | Model 4 | 33380           | 0.624        | -     | -                  | -          | 0.977                   | 539.6 | 0.0           | 0.37           | Yes                                    | <sup>11</sup> |
| 2              | <i>D. magna</i>    | TiO <sub>2</sub> | aqueous       | 1             | Yes                     | Model 5 | -               | 0.906        | -     | 61554              | 1.428      | 0.971                   | 549.3 | 9.7           | 0.00           | Yes                                    | <sup>11</sup> |
| 3              | <i>D. magna</i>    | TiO <sub>2</sub> | aqueous       | 1             | Yes                     | Model 1 | 14157           | 0.420        | -     | -                  | -          | 0.924                   | 547.1 | 2.4           | 0.17           | Yes                                    | <sup>11</sup> |
| 3              | <i>D. magna</i>    | TiO <sub>2</sub> | aqueous       | 1             | Yes                     | Model 2 | 14197           | 0.421        | 0.005 | -                  | -          | 0.921                   | 549.7 | 5.0           | 0.05           | Yes                                    | <sup>11</sup> |
| 3              | <i>D. magna</i>    | TiO <sub>2</sub> | aqueous       | 1             | Yes                     | Model 3 | 14330           | 0.429        | 0.001 | -                  | -          | 0.922                   | 549.5 | 4.8           | 0.05           | Yes                                    | <sup>11</sup> |
| 3              | <i>D. magna</i>    | TiO <sub>2</sub> | aqueous       | 1             | Yes                     | Model 4 | 14157           | 0.407        | -     | -                  | -          | 0.924                   | 547.1 | 2.4           | 0.17           | Yes                                    | <sup>11</sup> |
| 3              | <i>D. magna</i>    | TiO <sub>2</sub> | aqueous       | 1             | Yes                     | Model 5 | -               | 0.729        | -     | 43659              | 2.861      | 0.932                   | 544.7 | 0.0           | 0.56           | Yes                                    | <sup>11</sup> |
| 4              | <i>D. magna</i>    | TiO <sub>2</sub> | aqueous       | 1             | Yes                     | Model 1 | 24998           | 0.305        | -     | -                  | -          | 0.953                   | 585.6 | 7.7           | 0.02           | Yes                                    | <sup>11</sup> |
| 4              | <i>D. magna</i>    | TiO <sub>2</sub> | aqueous       | 1             | Yes                     | Model 2 | 24998           | 0.305        | 0.000 | -                  | -          | 0.951                   | 588.2 | 10.3          | 0.01           | Yes                                    | <sup>11</sup> |
| 4              | <i>D. magna</i>    | TiO <sub>2</sub> | aqueous       | 1             | Yes                     | Model 3 | 25028           | 0.306        | 0.000 | -                  | -          | 0.950                   | 588.3 | 10.4          | 0.01           | Yes                                    | <sup>11</sup> |
| 4              | <i>D. magna</i>    | TiO <sub>2</sub> | aqueous       | 1             | Yes                     | Model 4 | 24998           | 0.292        | -     | -                  | -          | 0.953                   | 585.7 | 7.8           | 0.02           | Yes                                    | <sup>11</sup> |
| 4              | <i>D. magna</i>    | TiO <sub>2</sub> | aqueous       | 1             | Yes                     | Model 5 | -               | 0.480        | -     | 107190             | 3.987      | 0.964                   | 577.9 | 0.0           | 0.95           | Yes                                    | <sup>11</sup> |
| 5              | <i>D. magna</i>    | TiO <sub>2</sub> | aqueous       | 1             | Yes                     | Model 1 | 59546           | 0.789        | -     | -                  | -          | 0.966                   | 580.8 | 0.0           | 0.39           | Yes                                    | <sup>11</sup> |
| 5              | <i>D. magna</i>    | TiO <sub>2</sub> | aqueous       | 1             | Yes                     | Model 2 | 59637           | 0.790        | 0.002 | -                  | -          | 0.964                   | 583.3 | 2.5           | 0.11           | Yes                                    | <sup>11</sup> |
| 5              | <i>D. magna</i>    | TiO <sub>2</sub> | aqueous       | 1             | Yes                     | Model 3 | 59658           | 0.701        | 0.000 | -                  | -          | 0.966                   | 583.4 | 2.6           | 0.10           | Yes                                    | <sup>11</sup> |
| 5              | <i>D. magna</i>    | TiO <sub>2</sub> | aqueous       | 1             | Yes                     | Model 4 | 59546           | 0.776        | -     | -                  | -          | 0.966                   | 580.8 | 0.0           | 0.38           | Yes                                    | <sup>11</sup> |
| 5              | <i>D. magna</i>    | TiO <sub>2</sub> | aqueous       | 1             | Yes                     | Model 5 | -               | 1.389        | -     | 88405              | 1.177      | 0.963                   | 587.0 | 6.2           | 0.02           | Yes                                    | <sup>11</sup> |
| 6              | <i>D. magna</i>    | TiO <sub>2</sub> | aqueous       | 1             | Yes                     | Model 1 | 29201           | 0.741        | -     | -                  | -          | 0.978                   | 521.2 | 0.0           | 0.31           | Yes                                    | <sup>11</sup> |
| 6              | <i>D. magna</i>    | TiO <sub>2</sub> | aqueous       | 1             | Yes                     | Model 2 | 29635           | 0.755        | 0.020 | -                  | -          | 0.978                   | 522.4 | 1.2           | 0.16           | Yes                                    | <sup>11</sup> |
| 6              | <i>D. magna</i>    | TiO <sub>2</sub> | aqueous       | 1             | Yes                     | Model 3 | 29953           | 0.772        | 0.001 | -                  | -          | 0.978                   | 521.9 | 0.7           | 0.21           | Yes                                    | <sup>11</sup> |
| 6              | <i>D. magna</i>    | TiO <sub>2</sub> | aqueous       | 1             | Yes                     | Model 4 | 29201           | 0.729        | -     | -                  | -          | 0.978                   | 521.2 | 0.0           | 0.30           | Yes                                    | <sup>11</sup> |
| 6              | <i>D. magna</i>    | TiO <sub>2</sub> | aqueous       | 1             | Yes                     | Model 5 | -               | 1.090        | -     | 45772              | 1.191      | 0.975                   | 527.1 | 5.9           | 0.02           | Yes                                    | <sup>11</sup> |
| 7              | <i>D. magna</i>    | TiO <sub>2</sub> | aqueous       | 1             | Yes                     | Model 1 | 13197           | 0.463        | -     | -                  | -          | 0.921                   | 539.2 | 24.9          | 0.00           | Yes                                    | <sup>11</sup> |
| 7              | <i>D. magna</i>    | TiO <sub>2</sub> | aqueous       | 1             | Yes                     | Model 2 | 13204           | 0.464        | 0.001 | -                  | -          | 0.920                   | 541.3 | 27.0          | 0.00           | Yes                                    | <sup>11</sup> |
| 7              | <i>D. magna</i>    | TiO <sub>2</sub> | aqueous       | 1             | Yes                     | Model 3 | 13524           | 0.484        | 0.002 | -                  | -          | 0.920                   | 541.4 | 27.1          | 0.00           | Yes                                    | <sup>11</sup> |
| 7              | <i>D. magna</i>    | TiO <sub>2</sub> | aqueous       | 1             | Yes                     | Model 4 | 13197           | 0.451        | -     | -                  | -          | 0.921                   | 539.2 | 24.9          | 0.00           | Yes                                    | <sup>11</sup> |
| 7              | <i>D. magna</i>    | TiO <sub>2</sub> | aqueous       | 1             | Yes                     | Model 5 | -               | 1.026        | -     | 39163              | 3.109      | 0.965                   | 514.3 | 0.0           | 1.00           | Yes                                    | <sup>11</sup> |

|    |                 |                  |         |       |     |         |          |       |       |         |        |        |       |      |      |     |    |
|----|-----------------|------------------|---------|-------|-----|---------|----------|-------|-------|---------|--------|--------|-------|------|------|-----|----|
| 8  | <i>D. magna</i> | SiO <sub>2</sub> | aqueous | 1     | Yes | Model 1 | 11698    | 0.676 | -     | -       | -      | 0.846  | 529.1 | 18.3 | 0.00 | Yes | 11 |
| 8  | <i>D. magna</i> | SiO <sub>2</sub> | aqueous | 1     | Yes | Model 2 | 12718    | 0.750 | 0.094 | -       | -      | 0.862  | 527.0 | 16.2 | 0.00 | Yes | 11 |
| 8  | <i>D. magna</i> | SiO <sub>2</sub> | aqueous | 1     | Yes | Model 3 | 14134    | 0.900 | 0.007 | -       | -      | 0.886  | 520.7 | 9.9  | 0.01 | Yes | 11 |
| 8  | <i>D. magna</i> | SiO <sub>2</sub> | aqueous | 1     | Yes | Model 4 | 11699    | 0.663 | -     | -       | -      | 0.840  | 529.5 | 18.7 | 0.00 | Yes | 11 |
| 8  | <i>D. magna</i> | SiO <sub>2</sub> | aqueous | 1     | Yes | Model 5 | -        | 0.072 | -     | 22387   | 1.951  | 0.915  | 510.8 | 0.0  | 0.99 | Yes | 11 |
| 9  | <i>D. magna</i> | SiO <sub>2</sub> | aqueous | 1     | Yes | Model 1 | 29596    | 0.664 | -     | -       | -      | 0.936  | 560.7 | 2.4  | 0.15 | Yes | 11 |
| 9  | <i>D. magna</i> | SiO <sub>2</sub> | aqueous | 1     | Yes | Model 2 | 31408    | 0.715 | 0.062 | -       | -      | 0.943  | 558.3 | 0.0  | 0.51 | Yes | 11 |
| 9  | <i>D. magna</i> | SiO <sub>2</sub> | aqueous | 1     | Yes | Model 3 | 31398    | 0.729 | 0.003 | -       | -      | 0.940  | 560.4 | 2.1  | 0.18 | Yes | 11 |
| 9  | <i>D. magna</i> | SiO <sub>2</sub> | aqueous | 1     | Yes | Model 4 | 29596    | 0.651 | -     | -       | -      | 0.936  | 560.8 | 2.5  | 0.15 | Yes | 11 |
| 9  | <i>D. magna</i> | SiO <sub>2</sub> | aqueous | 1     | Yes | Model 5 | -        | 0.587 | -     | 47362   | 0.872  | 0.920  | 569.7 | 11.4 | 0.00 | Yes | 11 |
| 10 | <i>D. magna</i> | TiO <sub>2</sub> | aqueous | 1     | Yes | Model 1 | 52       | 0.026 | -     | -       | -      | 0.858  | 99.5  | 0.0  | 0.31 | Yes | 12 |
| 10 | <i>D. magna</i> | TiO <sub>2</sub> | aqueous | 1     | Yes | Model 2 | 59       | 0.038 | 0.168 | -       | -      | 0.852  | 104.3 | 4.9  | 0.03 | Yes | 12 |
| 10 | <i>D. magna</i> | TiO <sub>2</sub> | aqueous | 1     | Yes | Model 3 | 55       | 0.035 | 0.085 | -       | -      | 0.841  | 105.0 | 5.6  | 0.02 | Yes | 12 |
| 10 | <i>D. magna</i> | TiO <sub>2</sub> | aqueous | 1     | Yes | Model 4 | 52       | 0.014 | -     | -       | -      | 0.858  | 99.5  | 0.0  | 0.31 | Yes | 12 |
| 10 | <i>D. magna</i> | TiO <sub>2</sub> | aqueous | 1     | Yes | Model 5 | -        | 0.020 | -     | 1225    | 12.010 | 0.909  | 99.4  | 0.0  | 0.32 | Yes | 12 |
| 11 | <i>D. magna</i> | TiO <sub>2</sub> | aqueous | 1     | No  | Model 1 | 3557     | 0.014 | -     | -       | -      | 0.413  | 197.9 | 33.0 | 0.00 | No  | 12 |
| 11 | <i>D. magna</i> | TiO <sub>2</sub> | aqueous | 1     | No  | Model 2 | 10591    | 0.156 | 0.685 | -       | -      | 0.777  | 192.7 | 27.8 | 0.00 | Yes | 12 |
| 11 | <i>D. magna</i> | TiO <sub>2</sub> | aqueous | 1     | No  | Model 3 | Unstable | 0.928 | 0.075 | -       | -      | -      | -     | -    | -    | No  | 12 |
| 11 | <i>D. magna</i> | TiO <sub>2</sub> | aqueous | 1     | No  | Model 4 | 3557     | 0.001 | -     | -       | -      | 0.413  | 197.9 | 33.0 | 0.00 | No  | 12 |
| 11 | <i>D. magna</i> | TiO <sub>2</sub> | aqueous | 1     | No  | Model 5 | -        | 0.008 | -     | 70541   | 3.674  | 0.986  | 164.9 | 0.0  | 1.00 | Yes | 12 |
| 12 | <i>D. magna</i> | TiO <sub>2</sub> | aqueous | 0.1   | No  | Model 1 | 3894     | 0.039 | -     | -       | -      | 0.483  | 148.3 | 15.6 | 0.00 | Yes | 12 |
| 12 | <i>D. magna</i> | TiO <sub>2</sub> | aqueous | 0.1   | No  | Model 2 | 6738     | 0.106 | 0.325 | -       | -      | 0.665  | 149.9 | 17.2 | 0.00 | Yes | 12 |
| 12 | <i>D. magna</i> | TiO <sub>2</sub> | aqueous | 0.1   | No  | Model 3 | 5356     | 0.088 | 0.117 | -       | -      | 0.505  | 152.3 | 19.6 | 0.00 | Yes | 12 |
| 12 | <i>D. magna</i> | TiO <sub>2</sub> | aqueous | 0.1   | No  | Model 4 | 3894     | 0.026 | -     | -       | -      | 0.483  | 148.3 | 15.6 | 0.00 | Yes | 12 |
| 12 | <i>D. magna</i> | TiO <sub>2</sub> | aqueous | 0.1   | No  | Model 5 | -        | 0.020 | -     | 5310    | 2.589  | 0.930  | 132.7 | 0.0  | 1.00 | Yes | 12 |
| 13 | <i>D. magna</i> | C <sub>60</sub>  | dietary | 15.02 | No  | Model 1 | 129      | 0.219 | -     | -       | -      | -0.107 | 194.1 | 21.2 | 0.00 | No  | 10 |
| 13 | <i>D. magna</i> | C <sub>60</sub>  | dietary | 15.02 | No  | Model 2 | 332      | 0.635 | 0.455 | -       | -      | 0.848  | 172.9 | 0.0  | 0.90 | Yes | 10 |
| 13 | <i>D. magna</i> | C <sub>60</sub>  | dietary | 15.02 | No  | Model 3 | 348      | 0.832 | 0.014 | -       | -      | 0.783  | 177.2 | 4.3  | 0.10 | Yes | 10 |
| 13 | <i>D. magna</i> | C <sub>60</sub>  | dietary | 15.02 | No  | Model 4 | 129      | 0.207 | -     | -       | -      | -0.107 | 194.1 | 21.2 | 0.00 | No  | 10 |
| 13 | <i>D. magna</i> | C <sub>60</sub>  | dietary | 15.02 | No  | Model 5 | -        | 0.042 | -     | 8046    | 0.761  | 0.320  | 192.2 | 19.3 | 0.00 | No  | 10 |
| 14 | <i>D. magna</i> | Graphene         | aqueous | 0.25  | Yes | Model 1 | 19164    | 0.915 | -     | -       | -      | 0.798  | 133.9 | 16.2 | 0.00 | No  | 13 |
| 14 | <i>D. magna</i> | Graphene         | aqueous | 0.25  | Yes | Model 2 | 19164    | 0.915 | 0.000 | -       | -      | 0.758  | 139.2 | 21.5 | 0.00 | Yes | 13 |
| 14 | <i>D. magna</i> | Graphene         | aqueous | 0.25  | Yes | Model 3 | 20492    | 1.008 | 0.002 | -       | -      | 0.762  | 139.0 | 21.3 | 0.00 | Yes | 13 |
| 14 | <i>D. magna</i> | Graphene         | aqueous | 0.25  | Yes | Model 4 | 19164    | 0.902 | -     | -       | -      | 0.798  | 133.9 | 16.2 | 0.00 | No  | 13 |
| 14 | <i>D. magna</i> | Graphene         | aqueous | 0.25  | Yes | Model 5 | -        | 2.780 | -     | 7988.00 | 3.595  | 0.984  | 117.7 | 0.0  | 1.00 | No  | 13 |
| 15 | <i>D. magna</i> | Graphene         | aqueous | 0.1   | Yes | Model 1 | 14934    | 0.539 | -     | -       | -      | 0.541  | 130.0 | 10.8 | 0.00 | No  | 13 |
| 15 | <i>D. magna</i> | Graphene         | aqueous | 0.1   | Yes | Model 2 | 15491    | 0.562 | 0.031 | -       | -      | 0.537  | 137.0 | 17.8 | 0.00 | Yes | 13 |
| 15 | <i>D. magna</i> | Graphene         | aqueous | 0.1   | Yes | Model 3 | 22133    | 0.892 | 0.007 | -       | -      | 0.541  | 136.5 | 17.3 | 0.00 | Yes | 13 |
| 15 | <i>D. magna</i> | Graphene         | aqueous | 0.1   | Yes | Model 4 | 14934    | 0.527 | -     | -       | -      | 0.636  | 130.0 | 10.8 | 0.00 | No  | 13 |
| 15 | <i>D. magna</i> | Graphene         | aqueous | 0.1   | Yes | Model 5 | -        | 2.713 | -     | 5414    | 7.848  | 0.936  | 119.2 | 0.0  | 0.99 | No  | 13 |
| 16 | <i>D. magna</i> | Graphene         | aqueous | 0.05  | Yes | Model 1 | 23789    | 0.875 | -     | -       | -      | 0.655  | 113.5 | 4.4  | 0.09 | No  | 13 |
| 16 | <i>D. magna</i> | Graphene         | aqueous | 0.05  | Yes | Model 2 | 26368    | 0.983 | 0.107 | -       | -      | 0.614  | 118.1 | 9.0  | 0.01 | Yes | 13 |
| 16 | <i>D. magna</i> | Graphene         | aqueous | 0.05  | Yes | Model 3 | 34902    | 1.477 | 0.007 | -       | -      | 0.692  | 116.1 | 7.0  | 0.02 | Yes | 13 |
| 16 | <i>D. magna</i> | Graphene         | aqueous | 0.05  | Yes | Model 4 | 23789    | 0.862 | -     | -       | -      | 0.655  | 113.5 | 4.4  | 0.09 | No  | 13 |
| 16 | <i>D. magna</i> | Graphene         | aqueous | 0.05  | Yes | Model 5 | -        | 2.707 | -     | 2325    | 5.276  | 0.902  | 109.1 | 0.0  | 0.79 | No  | 13 |
| 17 | <i>D. magna</i> | Graphene         | aqueous | 0.25  | Yes | Model 1 | 2729     | 0.063 | -     | -       | -      | 0.822  | 132.0 | 10.9 | 0.00 | Yes | 13 |
| 17 | <i>D. magna</i> | Graphene         | aqueous | 0.25  | Yes | Model 2 | 4335     | 0.128 | 0.373 | -       | -      | 0.897  | 130.7 | 9.6  | 0.01 | Yes | 13 |
| 17 | <i>D. magna</i> | Graphene         | aqueous | 0.25  | Yes | Model 3 | 4088     | 0.162 | 0.125 | -       | -      | 0.858  | 133.6 | 12.5 | 0.00 | Yes | 13 |
| 17 | <i>D. magna</i> | Graphene         | aqueous | 0.25  | Yes | Model 4 | 2729     | 0.051 | -     | -       | -      | 0.822  | 132.0 | 10.9 | 0.00 | Yes | 13 |
| 17 | <i>D. magna</i> | Graphene         | aqueous | 0.25  | Yes | Model 5 | -        | 0.042 | -     | 8423    | 4.056  | 0.975  | 121.1 | 0.0  | 0.98 | Yes | 13 |
| 18 | <i>D. magna</i> | Graphene         | aqueous | 0.1   | Yes | Model 1 | 2531     | 0.043 | -     | -       | -      | 0.532  | 129.0 | 8.4  | 0.01 | Yes | 13 |
| 18 | <i>D. magna</i> | Graphene         | aqueous | 0.1   | Yes | Model 2 | 6967     | 0.196 | 0.623 | -       | -      | 0.901  | 120.6 | 0.0  | 0.79 | Yes | 13 |

|    |                 |                  |         |       |     |         |        |       |       |        |         |       |       |      |      |     |    |
|----|-----------------|------------------|---------|-------|-----|---------|--------|-------|-------|--------|---------|-------|-------|------|------|-----|----|
| 18 | <i>D. magna</i> | Graphene         | aqueous | 0.1   | Yes | Model 3 | 9444   | 0.490 | 0.100 | -      | -       | 0.861 | 123.6 | 3.0  | 0.18 | Yes | 13 |
| 18 | <i>D. magna</i> | Graphene         | aqueous | 0.1   | Yes | Model 4 | 2531   | 0.030 | -     | -      | -       | 0.532 | 129.0 | 8.4  | 0.01 | Yes | 13 |
| 18 | <i>D. magna</i> | Graphene         | aqueous | 0.1   | Yes | Model 5 | -      | 0.034 | -     | 5414   | 7.848   | 0.801 | 131.0 | 10.4 | 0.00 | No  | 13 |
| 19 | <i>D. magna</i> | Graphene         | aqueous | 0.05  | Yes | Model 1 | 2144   | 0.014 | -     | -      | -       | 0.749 | 112.3 | 12.3 | 0.00 | No  | 13 |
| 19 | <i>D. magna</i> | Graphene         | aqueous | 0.05  | Yes | Model 2 | 6068   | 0.146 | 0.886 | -      | -       | 0.960 | 102.8 | 2.8  | 0.19 | Yes | 13 |
| 19 | <i>D. magna</i> | Graphene         | aqueous | 0.05  | Yes | Model 3 | 12629  | 1.015 | 0.118 | -      | -       | 0.907 | 107.0 | 7.0  | 0.02 | Yes | 13 |
| 19 | <i>D. magna</i> | Graphene         | aqueous | 0.05  | Yes | Model 4 | 2144   | 0.001 | -     | -      | -       | 0.749 | 113.7 | 13.7 | 0.00 | No  | 13 |
| 19 | <i>D. magna</i> | Graphene         | aqueous | 0.05  | Yes | Model 5 | -      | 0.004 | -     | 2357   | 5.431   | 0.970 | 100.0 | 0.0  | 0.78 | Yes | 13 |
| 20 | <i>D. magna</i> | GO               | aqueous | 10    | No  | Model 1 | 1519   | 0.104 | -     | -      | -       | 0.891 | 142.0 | 0.0  | 0.48 | Yes | 14 |
| 20 | <i>D. magna</i> | GO               | aqueous | 10    | No  | Model 2 | 1795   | 0.134 | 0.143 | -      | -       | 0.884 | 147.7 | 5.6  | 0.03 | Yes | 14 |
| 20 | <i>D. magna</i> | GO               | aqueous | 10    | No  | Model 3 | 1616   | 0.120 | 0.025 | -      | -       | 0.860 | 149.0 | 6.9  | 0.01 | Yes | 14 |
| 20 | <i>D. magna</i> | GO               | aqueous | 10    | No  | Model 4 | 1519   | 0.091 | -     | -      | -       | 0.891 | 142.0 | 0.0  | 0.48 | Yes | 14 |
| 20 | <i>D. magna</i> | GO               | aqueous | 10    | No  | Model 5 | -      | 0.077 | -     | 12598  | 2.138   | 0.950 | 151.7 | 9.7  | 0.00 | Yes | 14 |
| 21 | <i>D. magna</i> | GO               | aqueous | 5     | No  | Model 1 | 2915   | 0.117 | -     | -      | -       | 0.972 | 131.7 | 0.0  | 0.49 | Yes | 14 |
| 21 | <i>D. magna</i> | GO               | aqueous | 5     | No  | Model 2 | 2956   | 0.119 | 0.013 | -      | -       | 0.962 | 138.9 | 7.2  | 0.01 | Yes | 14 |
| 21 | <i>D. magna</i> | GO               | aqueous | 5     | No  | Model 3 | 2830   | 0.109 | 0.000 | -      | -       | 0.954 | 150.3 | 18.6 | 0.00 | Yes | 14 |
| 21 | <i>D. magna</i> | GO               | aqueous | 5     | No  | Model 4 | 2915   | 0.104 | -     | -      | -       | 0.972 | 131.7 | 0.0  | 0.49 | Yes | 14 |
| 21 | <i>D. magna</i> | GO               | aqueous | 5     | No  | Model 5 | -      | 0.103 | -     | 131492 | 4.742   | 0.975 | 146.0 | 14.3 | 0.00 | Yes | 14 |
| 22 | <i>D. magna</i> | C <sub>60</sub>  | aqueous | 2     | No  | Model 1 | 26318  | 1.285 | -     | -      | -       | 0.867 | 201.3 | 0.9  | 0.26 | No  | 14 |
| 22 | <i>D. magna</i> | C <sub>60</sub>  | aqueous | 2     | No  | Model 2 | 27275  | 1.335 | 0.041 | -      | -       | 0.852 | 205.4 | 5.0  | 0.03 | Yes | 15 |
| 22 | <i>D. magna</i> | C <sub>60</sub>  | aqueous | 2     | No  | Model 3 | 28675  | 1.437 | 0.001 | -      | -       | 0.855 | 205.1 | 4.7  | 0.04 | Yes | 15 |
| 22 | <i>D. magna</i> | C <sub>60</sub>  | aqueous | 2     | No  | Model 4 | 26318  | 1.273 | -     | -      | -       | 0.867 | 201.3 | 0.9  | 0.26 | No  | 15 |
| 22 | <i>D. magna</i> | C <sub>60</sub>  | aqueous | 2     | No  | Model 5 | -      | 2.170 | -     | 47683  | 1.243   | 0.919 | 200.4 | 0.0  | 0.40 | No  | 15 |
| 23 | <i>D. magna</i> | C <sub>60</sub>  | aqueous | 0.2   | No  | Model 1 | 79505  | 1.140 | -     | -      | -       | 0.736 | 152.0 | 6.7  | 0.03 | No  | 15 |
| 23 | <i>D. magna</i> | C <sub>60</sub>  | aqueous | 0.2   | No  | Model 2 | 100939 | 1.469 | 0.233 | -      | -       | 0.842 | 151.0 | 5.7  | 0.05 | Yes | 15 |
| 23 | <i>D. magna</i> | C <sub>60</sub>  | aqueous | 0.2   | No  | Model 3 | 127725 | 2.081 | 0.003 | -      | -       | 0.916 | 145.3 | 0.0  | 0.89 | Yes | 15 |
| 23 | <i>D. magna</i> | C <sub>60</sub>  | aqueous | 0.2   | No  | Model 4 | 79505  | 1.140 | -     | -      | -       | 0.735 | 152.0 | 6.8  | 0.03 | No  | 15 |
| 23 | <i>D. magna</i> | C <sub>60</sub>  | aqueous | 0.2   | No  | Model 5 | -      | 1.516 | -     | 15702  | 1.020   | 0.745 | 184.4 | 39.1 | 0.00 | No  | 15 |
| 24 | <i>D. magna</i> | C <sub>60</sub>  | aqueous | 2     | No  | Model 1 | 1826   | 0.035 | -     | -      | -       | 0.858 | 185.4 | 2.6  | 0.16 | No  | 15 |
| 24 | <i>D. magna</i> | C <sub>60</sub>  | aqueous | 2     | No  | Model 2 | 3673   | 0.111 | 0.320 | -      | -       | 0.882 | 186.8 | 4.0  | 0.08 | Yes | 16 |
| 24 | <i>D. magna</i> | C <sub>60</sub>  | aqueous | 2     | No  | Model 3 | 3166   | 0.120 | 0.124 | -      | -       | 0.857 | 188.7 | 5.9  | 0.03 | Yes | 16 |
| 24 | <i>D. magna</i> | C <sub>60</sub>  | aqueous | 2     | No  | Model 4 | 1826   | 0.022 | -     | -      | -       | 0.858 | 185.4 | 2.6  | 0.16 | No  | 16 |
| 24 | <i>D. magna</i> | C <sub>60</sub>  | aqueous | 2     | No  | Model 5 | -      | 0.033 | -     | 75288  | 6.062   | 0.937 | 182.8 | 0.0  | 0.58 | Yes | 16 |
| 25 | <i>D. magna</i> | Au               | aqueous | 0.05  | No  | Model 1 | 18709  | 0.145 | -     | -      | -       | 0.273 | 169.8 | 0.0  | 0.48 | No  | 17 |
| 25 | <i>D. magna</i> | Au               | aqueous | 0.05  | No  | Model 2 | 18709  | 0.145 | 0.000 | -      | -       | 0.152 | 175.8 | 6.0  | 0.02 | No  | 17 |
| 25 | <i>D. magna</i> | Au               | aqueous | 0.05  | No  | Model 3 | 18714  | 0.145 | 0.000 | -      | -       | 0.152 | 175.8 | 6.0  | 0.02 | No  | 17 |
| 25 | <i>D. magna</i> | Au               | aqueous | 0.05  | No  | Model 4 | 18709  | 0.132 | -     | -      | -       | 0.273 | 169.8 | 0.0  | 0.48 | No  | 17 |
| 25 | <i>D. magna</i> | Au               | aqueous | 0.05  | No  | Model 5 | -      | -     | -     | -      | -       | -     | -     | -    | -    | No  | 17 |
| 26 | <i>D. magna</i> | Au               | aqueous | 0.4   | Yes | Model 1 | 13364  | 0.399 | -     | -      | -       | 0.800 | 205.6 | 25.0 | 0.00 | No  | 17 |
| 26 | <i>D. magna</i> | Au               | aqueous | 0.4   | Yes | Model 2 | 13364  | 0.399 | 0.000 | -      | -       | 0.850 | 210.0 | 29.4 | 0.00 | No  | 17 |
| 26 | <i>D. magna</i> | Au               | aqueous | 0.4   | Yes | Model 3 | 13764  | 0.419 | 0.002 | -      | -       | 0.866 | 207.2 | 26.6 | 0.00 | No  | 17 |
| 26 | <i>D. magna</i> | Au               | aqueous | 0.4   | Yes | Model 4 | 13364  | 0.386 | -     | -      | -       | 0.822 | 201.9 | 21.3 | 0.00 | No  | 17 |
| 26 | <i>D. magna</i> | Au               | aqueous | 0.4   | Yes | Model 5 | -      | 3.895 | -     | 83356  | 44.710  | 0.992 | 180.6 | 0.0  | 1.00 | Yes | 17 |
| 27 | <i>D. magna</i> | Au               | aqueous | 0.4   | No  | Model 1 | 18897  | 0.285 | -     | -      | -       | 0.760 | 220.2 | 53.0 | 0.00 | No  | 17 |
| 27 | <i>D. magna</i> | Au               | aqueous | 0.4   | No  | Model 2 | 18897  | 0.285 | 0.000 | -      | -       | 0.820 | 224.5 | 57.3 | 0.00 | No  | 17 |
| 27 | <i>D. magna</i> | Au               | aqueous | 0.4   | No  | Model 3 | 18897  | 0.285 | 0.000 | -      | -       | 0.820 | 212.4 | 45.2 | 0.00 | No  | 17 |
| 27 | <i>D. magna</i> | Au               | aqueous | 0.4   | No  | Model 4 | 18897  | 0.273 | -     | -      | -       | 0.760 | 212.6 | 45.4 | 0.00 | No  | 17 |
| 27 | <i>D. magna</i> | Au               | aqueous | 0.4   | No  | Model 5 | -      | 1.257 | -     | 287755 | 109.600 | 0.999 | 167.2 | 0.0  | 1.00 | Yes | 17 |
| 28 | <i>D. rerio</i> | TiO <sub>2</sub> | dietary | 61086 | Yes | Model 1 | 0.0003 | 0.041 | -     | -      | -       | 0.827 | 103.4 | 0.0  | 0.35 | Yes | 18 |
| 28 | <i>D. rerio</i> | TiO <sub>2</sub> | dietary | 61086 | Yes | Model 2 | 0.0003 | 0.041 | 0.000 | -      | -       | 0.803 | 107.0 | 3.6  | 0.06 | Yes | 18 |
| 28 | <i>D. rerio</i> | TiO <sub>2</sub> | dietary | 61086 | Yes | Model 3 | 0.0003 | 0.054 | 0.006 | -      | -       | 0.816 | 106.3 | 2.9  | 0.08 | Yes | 18 |
| 28 | <i>D. rerio</i> | TiO <sub>2</sub> | dietary | 61086 | Yes | Model 4 | 0.0003 | 0.040 | -     | -      | -       | 0.846 | 103.4 | 0.0  | 0.35 | Yes | 18 |

|    |                 |                  |         |       |     |         |        |       |       |        |         |       |       |      |      |     |    |
|----|-----------------|------------------|---------|-------|-----|---------|--------|-------|-------|--------|---------|-------|-------|------|------|-----|----|
| 28 | <i>D. rerio</i> | TiO <sub>2</sub> | dietary | 61086 | Yes | Model 5 | -      | 0.057 | -     | 517.70 | 40.090  | 0.860 | 104.9 | 1.5  | 0.16 | Yes | 18 |
| 29 | <i>D. rerio</i> | TiO <sub>2</sub> | dietary | 4520  | Yes | Model 1 | 0.0012 | 0.055 | -     | -      | -       | 0.923 | 62.3  | 0.0  | 0.35 | Yes | 18 |
| 29 | <i>D. rerio</i> | TiO <sub>2</sub> | dietary | 4520  | Yes | Model 2 | 0.0014 | 0.061 | 0.060 | -      | -       | 0.919 | 65.8  | 3.5  | 0.06 | Yes | 18 |
| 29 | <i>D. rerio</i> | TiO <sub>2</sub> | dietary | 4520  | Yes | Model 3 | 0.0015 | 0.072 | 0.004 | -      | -       | 0.930 | 64.2  | 1.8  | 0.14 | Yes | 18 |
| 29 | <i>D. rerio</i> | TiO <sub>2</sub> | dietary | 4520  | Yes | Model 4 | 0.0012 | 0.053 | -     | -      | -       | 0.923 | 62.3  | 0.0  | 0.35 | Yes | 18 |
| 29 | <i>D. rerio</i> | TiO <sub>2</sub> | dietary | 4520  | Yes | Model 5 | -      | 0.050 | -     | 108.80 | 9.715   | 0.925 | 64.9  | 2.6  | 0.10 | Yes | 18 |
| 30 | <i>D. rerio</i> | TiO <sub>2</sub> | aqueous | 0.55  | Yes | Model 1 | 1.54   | 0.009 | -     | -      | -       | 0.855 | 63.9  | 1.6  | 0.21 | Yes | 18 |
| 30 | <i>D. rerio</i> | TiO <sub>2</sub> | aqueous | 0.55  | Yes | Model 2 | 1.54   | 0.009 | 0.000 | -      | -       | 0.834 | 69.2  | 6.8  | 0.02 | Yes | 18 |
| 30 | <i>D. rerio</i> | TiO <sub>2</sub> | aqueous | 0.55  | Yes | Model 3 | 1.52   | 0.009 | 0.000 | -      | -       | 0.832 | 69.3  | 7.0  | 0.01 | Yes | 18 |
| 30 | <i>D. rerio</i> | TiO <sub>2</sub> | aqueous | 0.55  | Yes | Model 4 | 1.54   | 0.008 | -     | -      | -       | 0.855 | 63.2  | 0.8  | 0.30 | Yes | 18 |
| 30 | <i>D. rerio</i> | TiO <sub>2</sub> | aqueous | 0.55  | Yes | Model 5 | -      | 0.013 | -     | 234    | 410.900 | 0.911 | 62.3  | 0.0  | 0.46 | Yes | 18 |
| 31 | <i>D. rerio</i> | TiO <sub>2</sub> | aqueous | 0.06  | Yes | Model 1 | 0.29   | 0.009 | -     | -      | -       | 0.106 | -15.8 | 1.3  | 0.13 | Yes | 18 |
| 31 | <i>D. rerio</i> | TiO <sub>2</sub> | aqueous | 0.06  | Yes | Model 2 | 0.60   | 0.023 | 0.498 | -      | -       | 0.432 | -17.0 | 0.1  | 0.24 | Yes | 18 |
| 31 | <i>D. rerio</i> | TiO <sub>2</sub> | aqueous | 0.06  | Yes | Model 3 | 0.62   | 0.033 | 0.058 | -      | -       | 0.345 | -17.1 | 0.0  | 0.25 | Yes | 18 |
| 31 | <i>D. rerio</i> | TiO <sub>2</sub> | aqueous | 0.06  | Yes | Model 4 | 0.29   | 0.008 | -     | -      | -       | 0.106 | -15.8 | 1.3  | 0.13 | Yes | 18 |
| 31 | <i>D. rerio</i> | TiO <sub>2</sub> | aqueous | 0.06  | Yes | Model 5 | -      | 0.006 | -     | 1.69   | 29.250  | 0.434 | -17.0 | 0.1  | 0.24 | Yes | 18 |
| 32 | <i>D. rerio</i> | CNTs             | aqueous | 0.2   | Yes | Model 1 | 6.97   | 0.023 | -     | -      | -       | 0.433 | 425.6 | 9.5  | 0.01 | Yes | 15 |
| 32 | <i>D. rerio</i> | CNTs             | aqueous | 0.2   | Yes | Model 2 | 6.97   | 0.023 | 0.000 | -      | -       | 0.418 | 426.3 | 10.2 | 0.01 | Yes | 15 |
| 32 | <i>D. rerio</i> | CNTs             | aqueous | 0.2   | Yes | Model 3 | 6.97   | 0.023 | 0.000 | -      | -       | 0.418 | 426.3 | 10.2 | 0.01 | Yes | 15 |
| 32 | <i>D. rerio</i> | CNTs             | aqueous | 0.2   | Yes | Model 4 | 6.97   | 0.022 | -     | -      | -       | 0.433 | 425.6 | 9.5  | 0.01 | Yes | 15 |
| 32 | <i>D. rerio</i> | CNTs             | aqueous | 0.2   | Yes | Model 5 | -      | 0.301 | -     | 902    | 343.300 | 0.644 | 416.1 | 0.0  | 0.97 | Yes | 15 |
| 33 | <i>D. rerio</i> | C <sub>60</sub>  | aqueous | 1     | Yes | Model 1 | 129.72 | 0.082 | -     | -      | -       | 0.306 | 155.6 | 0.0  | 0.40 | Yes | 15 |
| 33 | <i>D. rerio</i> | C <sub>60</sub>  | aqueous | 1     | Yes | Model 2 | 149.95 | 0.096 | 0.120 | -      | -       | 0.250 | 158.6 | 3.0  | 0.09 | Yes | 15 |
| 33 | <i>D. rerio</i> | C <sub>60</sub>  | aqueous | 1     | Yes | Model 3 | 104.00 | 0.057 | 0.000 | -      | -       | 0.178 | 160.7 | 5.1  | 0.03 | Yes | 15 |
| 33 | <i>D. rerio</i> | C <sub>60</sub>  | aqueous | 1     | Yes | Model 4 | 129.72 | 0.080 | -     | -      | -       | 0.306 | 155.6 | 0.0  | 0.40 | Yes | 15 |
| 33 | <i>D. rerio</i> | C <sub>60</sub>  | aqueous | 1     | Yes | Model 5 | -      | 0.081 | -     | 323.80 | 5.213   | 0.229 | 159.1 | 3.5  | 0.07 | Yes | 15 |
| 34 | <i>D. rerio</i> | C <sub>60</sub>  | aqueous | 2     | Yes | Model 1 | 12.87  | 0.077 | -     | -      | -       | 0.105 | 169.5 | 0.0  | 0.35 | Yes | 15 |
| 34 | <i>D. rerio</i> | C <sub>60</sub>  | aqueous | 2     | Yes | Model 2 | 14.47  | 0.088 | 0.112 | -      | -       | 0.027 | 172.6 | 3.1  | 0.07 | Yes | 15 |
| 34 | <i>D. rerio</i> | C <sub>60</sub>  | aqueous | 2     | Yes | Model 3 | 12.87  | 0.080 | 0.000 | -      | -       | 0.023 | 170.7 | 1.2  | 0.19 | Yes | 15 |
| 34 | <i>D. rerio</i> | C <sub>60</sub>  | aqueous | 2     | Yes | Model 4 | 12.87  | 0.075 | -     | -      | -       | 0.104 | 169.5 | 0.0  | 0.35 | Yes | 15 |
| 34 | <i>D. rerio</i> | C <sub>60</sub>  | aqueous | 2     | Yes | Model 5 | -      | 0.033 | -     | 351.10 | 6.610   | 0.004 | 173.6 | 4.1  | 0.04 | Yes | 15 |

\* For dietary exposure, units for food concentration (C) are in mg/kg.

\*\* For dietary exposure, units for k<sub>a</sub> are in mg/kg/h.

• Experimental    — Model 1    — Model 2    — Model 3    — Model 4    — Model 5

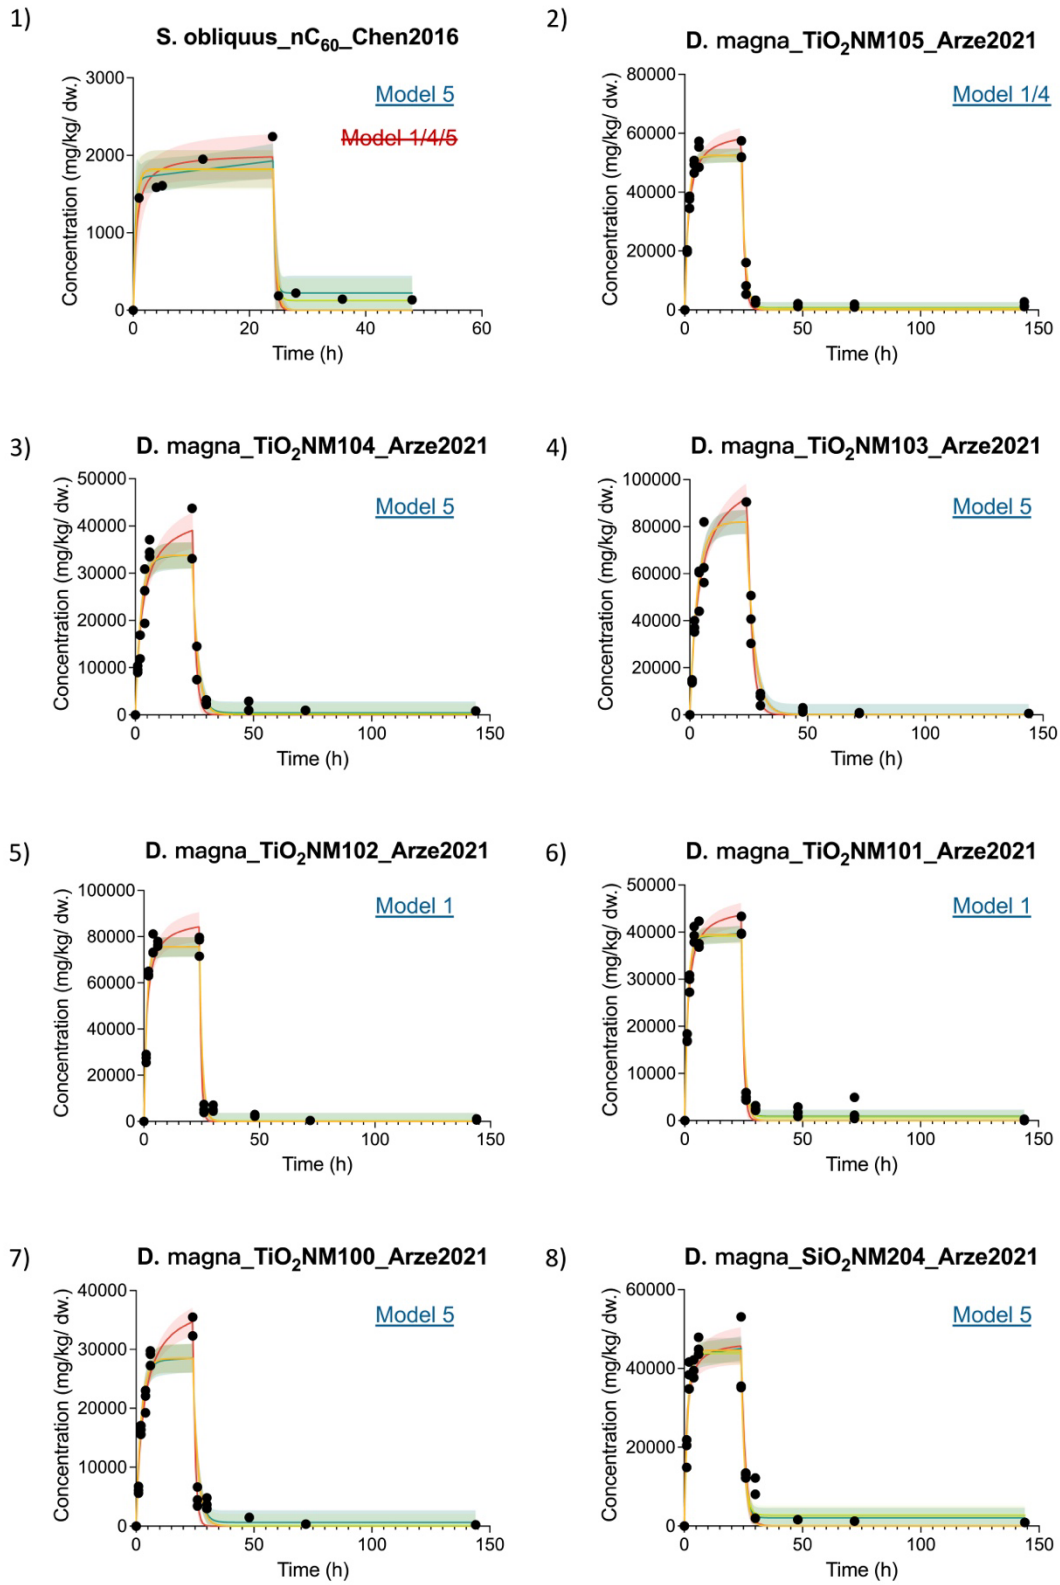



• Experimental    — Model 1    — Model 2    — Model 3    — Model 4    — Model 5

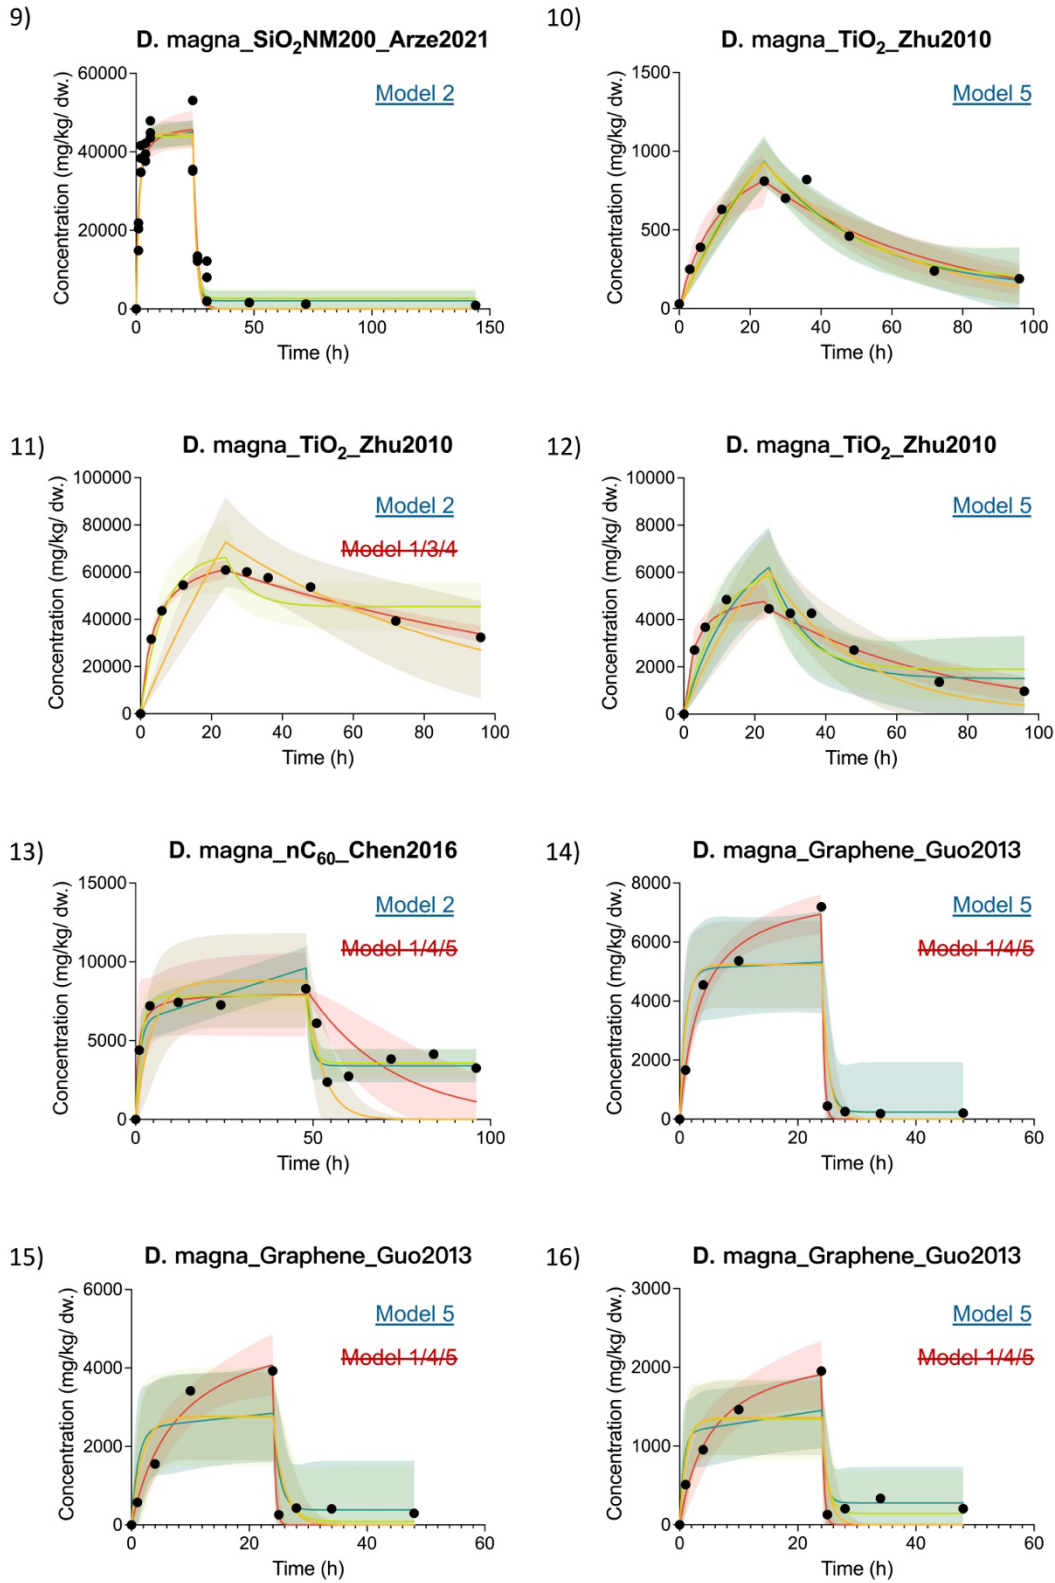

• Experimental — Model 1 — Model 2 — Model 3 — Model 4 — Model 5

17)

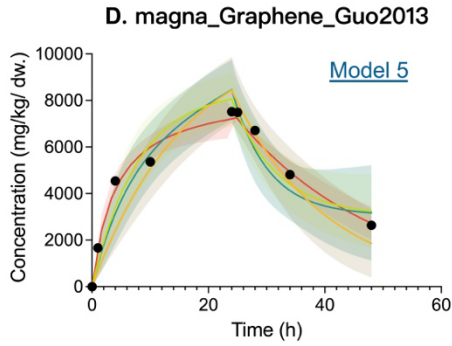

18)

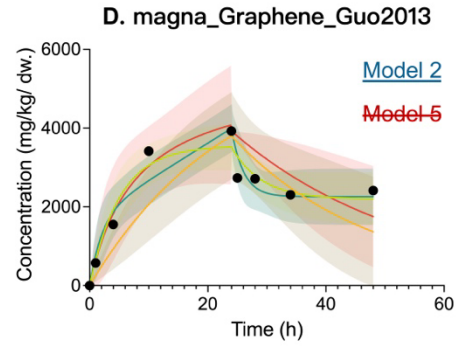

19)

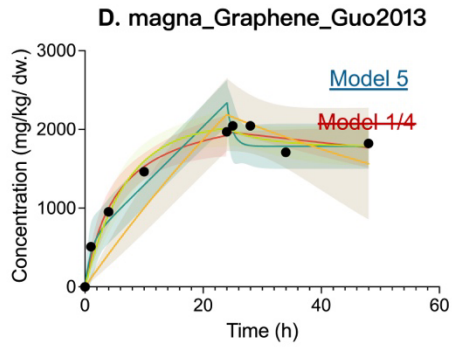

20)

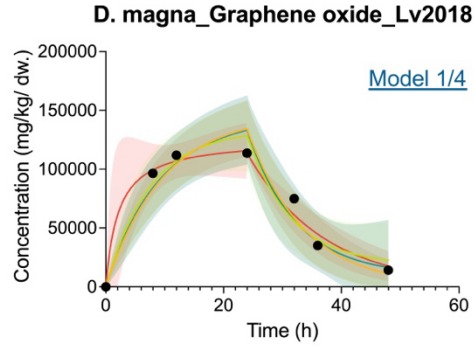

21)

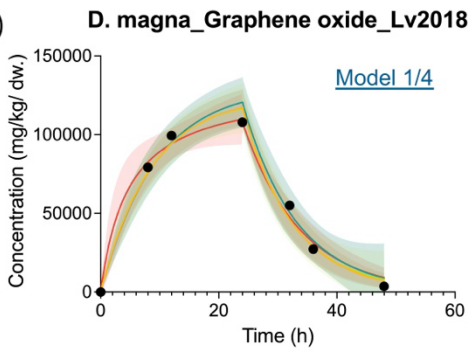

22)

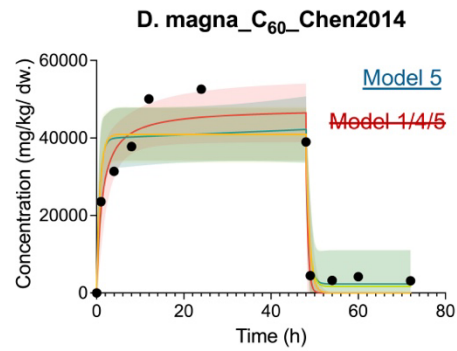

23)

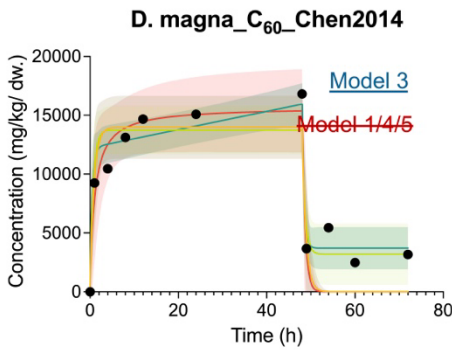

24)

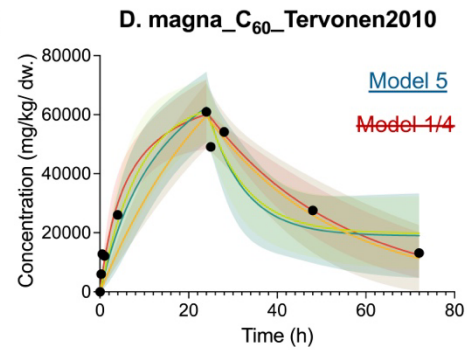

• Experimental    Model 1    Model 2    Model 3    Model 4    Model 5

25)

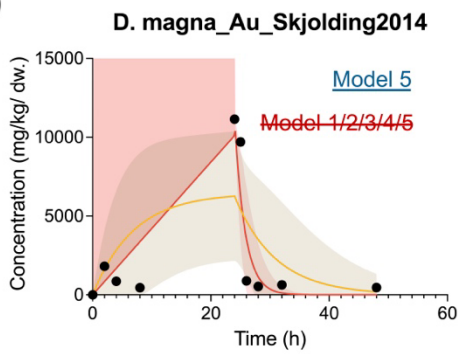

26)

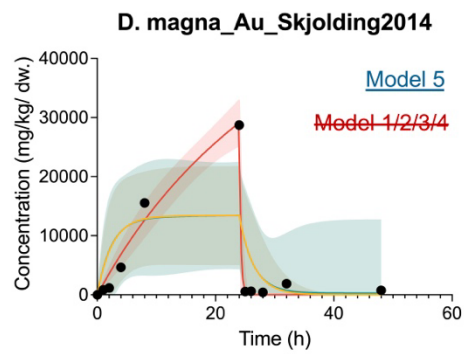

27)

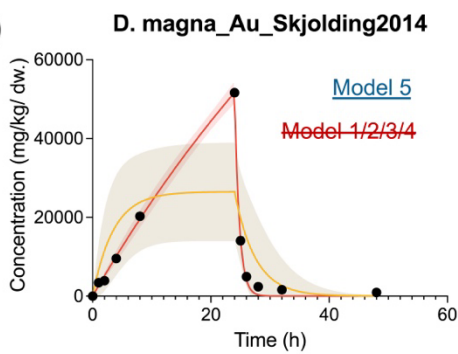

28)

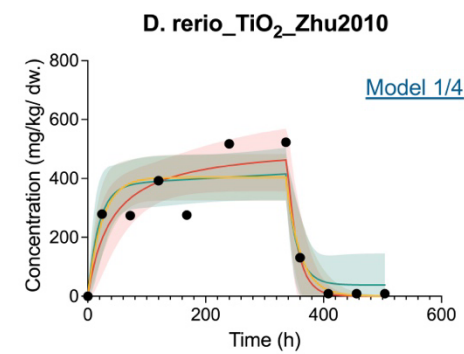

29)

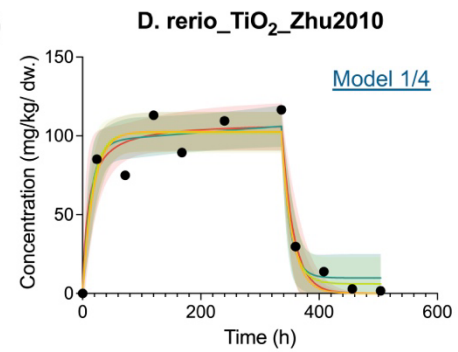

30)

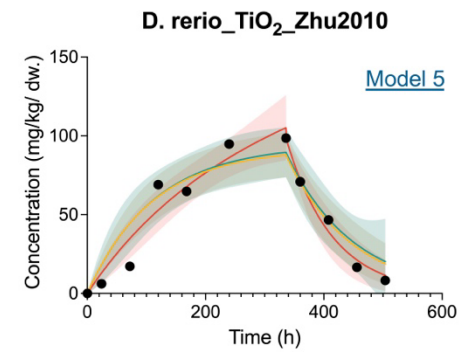

31)

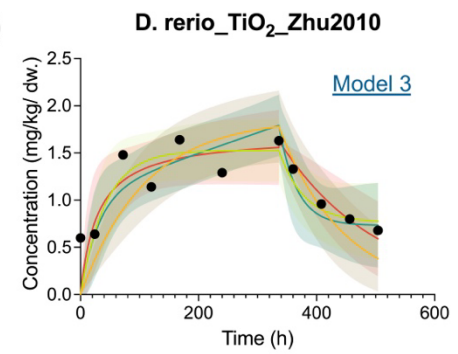

32)

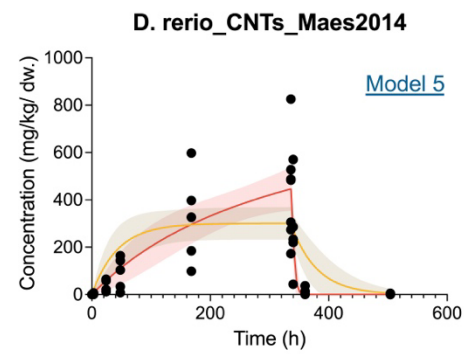

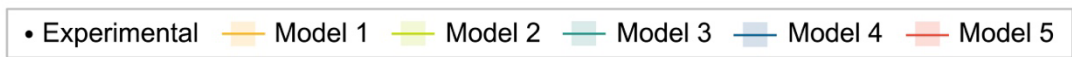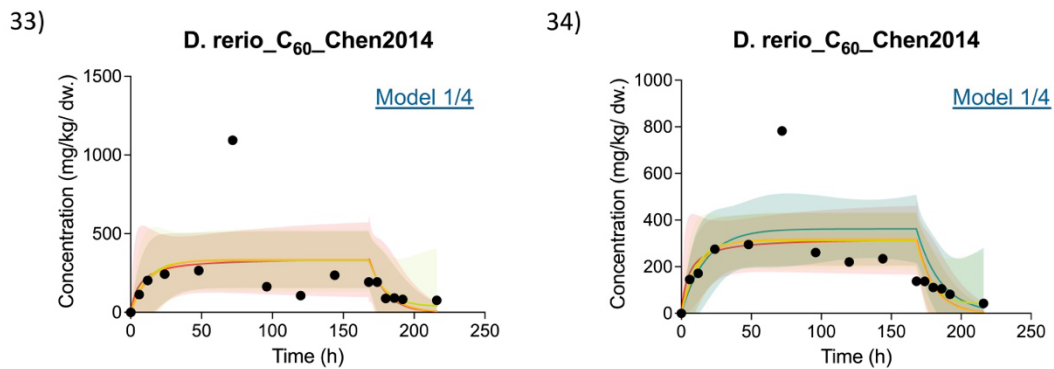

Figure S1: Predicted organism body burden during uptake and elimination of ENMs with 95% confidence bands from five models in comparison with the experimental data for all datasets. The model with an underline in blue is the model with the lowest AICc score. The model with a strikethrough in red is excluded for further statistical analysis based on a visual inspection with reference to the 95% confidence bands.

### 3 References

1. Anderson-Sprecher R. Model comparisons and  $r^2$ . *Am Stat.* 1994;48(2):113–7.
2. Kvålseth TO. Cautionary Note About  $R^2$ . *Am Stat.* 1985;39(4):279–85.
3. Akaike H. A New Look at the Statistical Model Identification. *IEEE Trans Autom Control.* 1974;19:716–23.
4. Akaike H. Information Theory and an Extension of the Maximum Likelihood Principle BT - Breakthroughs in Statistics: Foundations and Basic Theory. *Breakthroughs in Statistics.* 1992. 610–624 p.
5. Akaike H. On the Likelihood of a Time Series Model. *J R Stat Soc.* 1978;27(3):217–35.
6. Dang BT, Tran DPH, Nguyen NKQ, Cao HTN, Tomoaki I, Huynh KPH, et al. Comparison of degradation kinetics of tannery wastewater treatment using a nonlinear model by salt-tolerant *Nitrosomonas* sp. and *Nitrobacter* sp. *Bioresour Technol.* 2022;351(3):127000.
7. Gustavo MF, Székely E, Tóth J. Kinetic Modeling of a Consecutive Enzyme-Catalyzed Enantioselective Reaction in Supercritical Media. *ACS Omega.* 2020;5(41):26795–806.
8. Burnham KP, Anderson DR. *Model Selection and Inference: A Practical Information-Theoretic Approach.* Vol. 65. Springer New York, N; 2003. 75–117 p.
9. Wagenmakers EJ, Farrell S. AIC model selection using Akaike weights. *Psychon Bull Rev.* 2004;11(1):192–6.
10. Chen Q, Hu X, Yin D, Wang R. Effect of subcellular distribution on nC60 uptake and transfer efficiency from *Scenedesmus obliquus* to *Daphnia magna*. *Ecotoxicol Environ Saf.* 2016;128:213–21.
11. Arze AR, Manier N, Chatel A, Mouneyrac C. Characterization of the nano-bio interaction between metallic oxide nanomaterials and freshwater microalgae using flow cytometry. *Nanotoxicology.* 2020;14(8):1082–95.
12. Zhu X, Chang Y, Chen Y. Toxicity and bioaccumulation of TiO<sub>2</sub> nanoparticle aggregates in *Daphnia magna*. *Chemosphere.* 2010;78(3):209–15.
13. Guo X, Dong S, Petersen EJ, Gao S, Huang Q, Mao L. Biological Uptake and Depuration of Radio-labeled Graphene by *Daphnia magna*. *Environ Sci Technol.* 2013;47(21):12524–31.
14. Lv X, Yang Y, Tao Y, Jiang Y, Chen B, Zhu X, et al. A mechanism study on toxicity of graphene oxide to *Daphnia magna*: Direct link between bioaccumulation and oxidative stress. *Environ Pollut.* 2018;234:953–9.
15. Chen Q, Yin D, Li J, Hu X. The effects of humic acid on the uptake and depuration of fullerene aqueous suspensions in two aquatic organisms. *Environ Toxicol Chem.* 2014;33(5):1090–7.
16. Tervonen K, Waissi G, Petersen EJ, Akkanen J, Kukkonen JVK. Analysis of fullerene-c-60 and kinetic measurements for its accumulation and depuration in *daphnia magna*. *Environ Toxicol*

- Chem. 2010;29(5):1072–8.
17. Skjolding LM, Kern K, Hjorth R, Hartmann N, Overgaard S, Ma G, et al. Uptake and depuration of gold nanoparticles in *Daphnia magna*. *Ecotoxicology*. 2014;23(7):1172–83.
  18. Zhu X, Wang J, Zhang X, Chang Y, Chen Y. Trophic transfer of TiO<sub>2</sub> nanoparticles from daphnia to zebrafish in a simplified freshwater food chain. *Chemosphere*. 2010;79(9):928–33.
